# Supplementary material for: A biocompatible betaine-functionalized polycation for coacervation
Source: Royal Society of Chemistry journal article supplement (doi:10.1039/c7sm01763d), 2017-11-10
Supplement: c7sm01763d1.pdf [file c7sm01763d1.pdf]

## Supplementary Data

### A Biocompatible Betaine-functionalized Polycation for Coacervation

Mintai P. Hwang<sup>a</sup>, Xiaochu Ding<sup>a</sup>, Jin Gao<sup>b</sup>, Abhinav P. Acharya<sup>b</sup>, Steven R. Little<sup>b</sup>, Yadong Wang<sup>a,1</sup>

<sup>a</sup>Meinig School of Biomedical Engineering, Cornell University, Ithaca, NY 14853, USA

<sup>b</sup>Department of Bioengineering, Swanson School of Engineering, University of Pittsburgh, Pittsburgh, PA 15261, USA

<sup>1</sup>Correspondence: Yadong Wang, Ph.D.  
E-mail: yw839@cornell.edu

**Running Title:** Betaine-functionalized Polycation

**Keywords:** Betaine, Polycation, Coacervate, Angiogenesis, Anti-bacterial

### Supplementary Figure 1: B-PED Synthesis

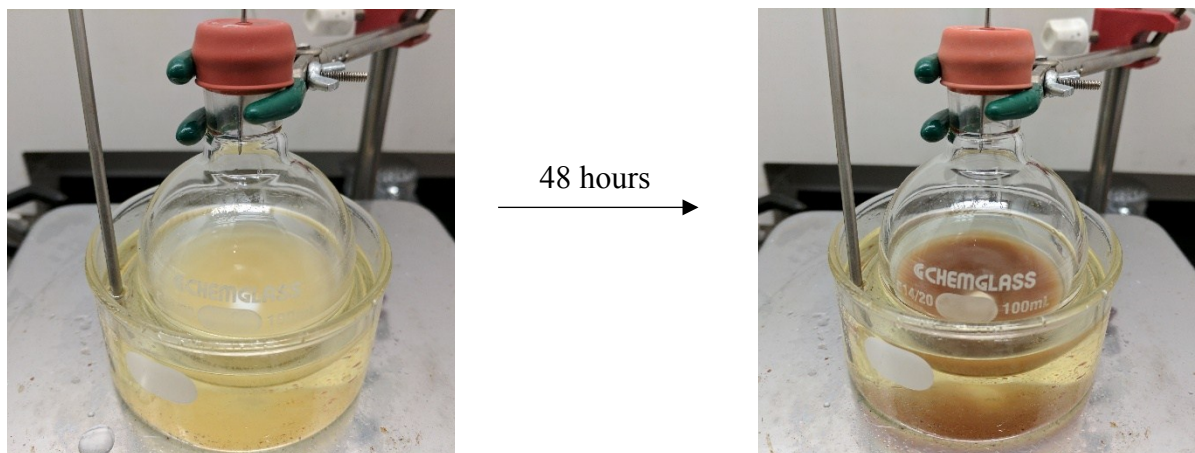

Conjugation of betaine onto PED yields a dark amber-colored product.

## Supplementary Figure 2: Zeta Potential of B-PED

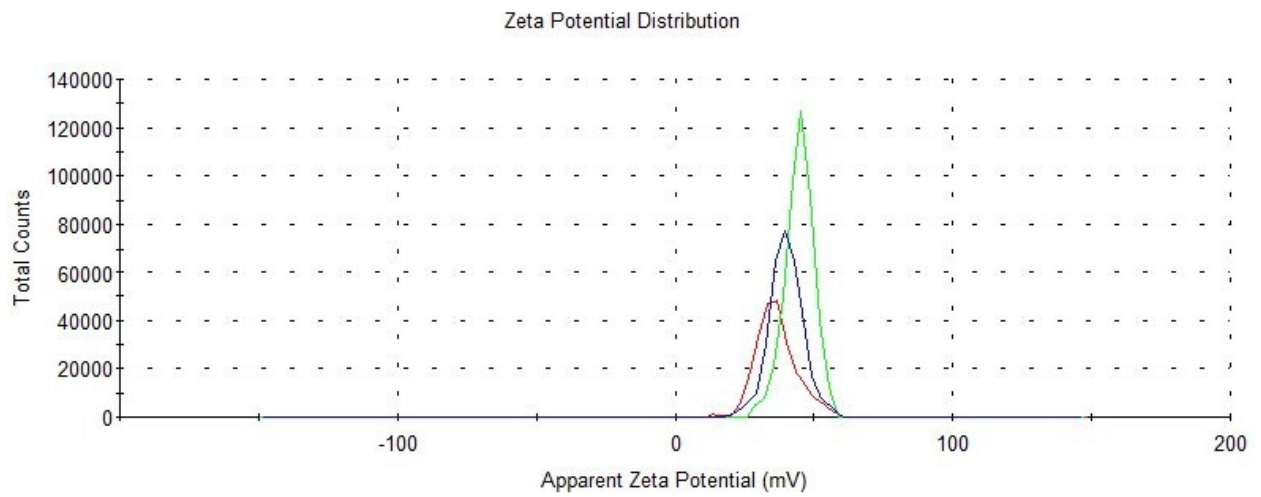

B-PED has an average zeta potential of  $42.0 \pm 2.3$  mV.

### Supplementary Figure 3: Toxicity of Betaine

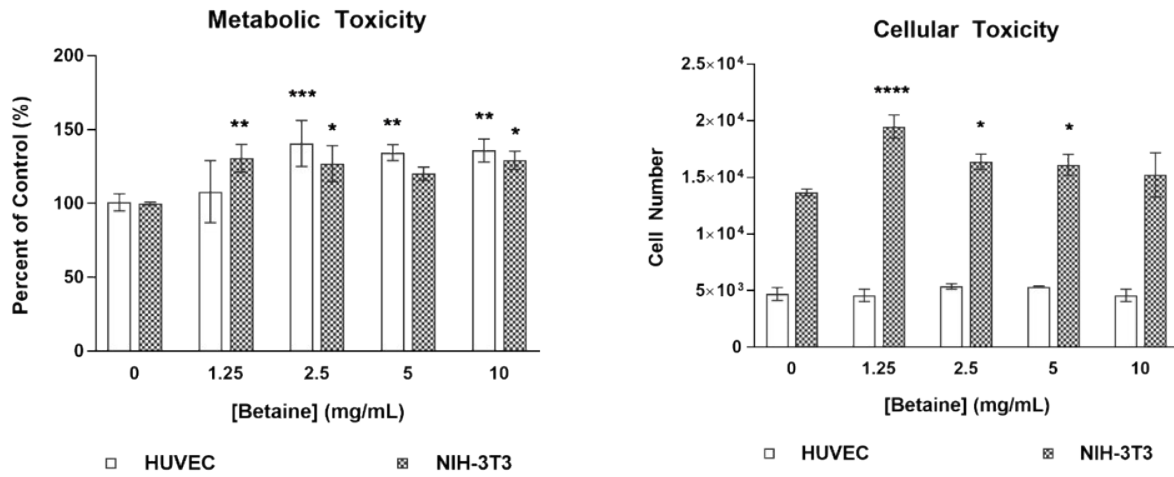

Soluble betaine is added exogenously to cells and incubated for 24 hours. Cytotoxicity is assessed via CellTiter-Blue and PicoGreen (n=3, mean ± SD, \*p<0.05, \*\*p<0.01, \*\*\*p<0.0001 compared to control).

#### Supplementary Figure 4: Effect of Betaine on In-vitro Angiogenesis

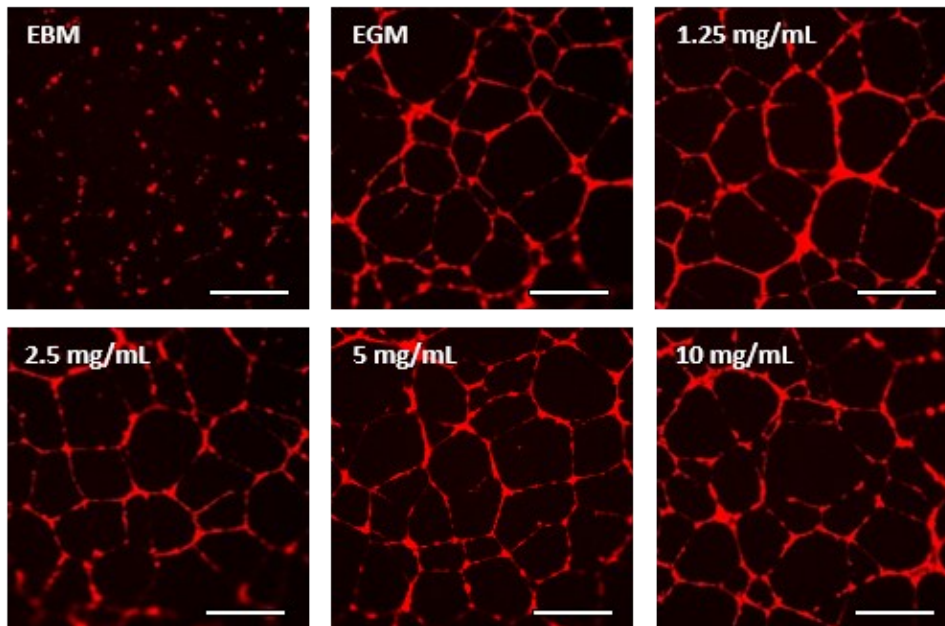

Exogenously added betaine has no effect on HUVEC tube formation (EBM: endothelial basal media, EGM: endothelial growth media). Cells are imaged 16 hours post-seeding (red: RFP, scale bar: 200  $\mu\text{m}$ ).

## Supplementary Figure 5: [B-PED] vs Size

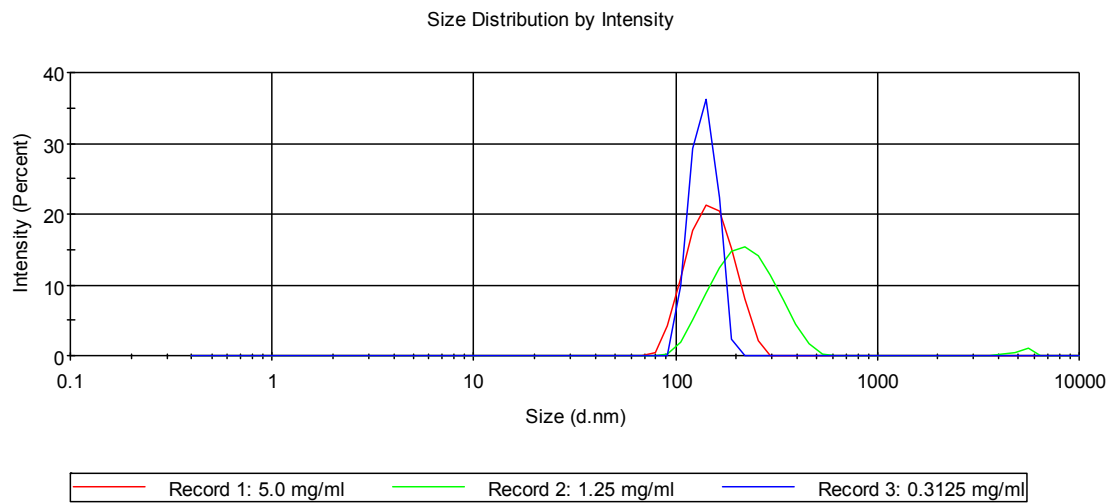

Different [B-PED] used in anti-bacterial experiments show no self-assembly or aggregation events.

**Supplementary Figure 6: [NaCl] vs Coacervate Stability**

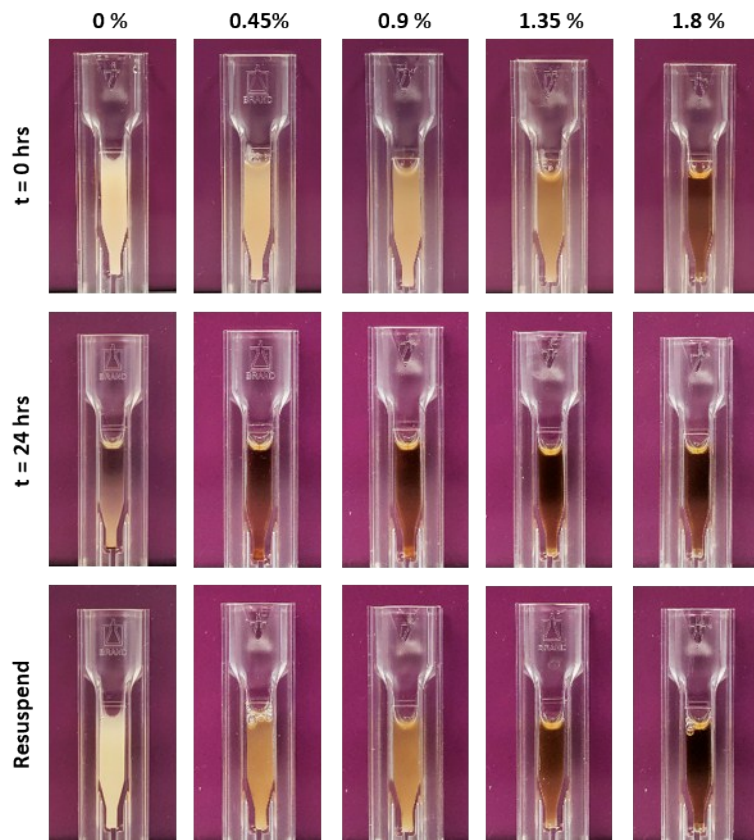

B-PED/heparin coacervates show a progressive decrease in turbidity with increasing [NaCl] (w/v). After 24 hours, the sedimented coacervate aggregate is re-agitated with a pipette.

**Supplementary Table 1: [NaCl] vs Coacervate Size and PDI**

| <b>[NaCl] (% w/v)</b> | <b>Average Diameter (nm)</b> | <b>Average. PDI</b> |
|-----------------------|------------------------------|---------------------|
| 0.0                   | 1477.7                       | 0.166               |
| 0.9                   | 1098.5                       | 0.241               |
| 1.8                   | 250.1                        | 0.883               |
